# Supplementary material
Source: MDPI journal article supplement (https://www.mdpi.com/2311-5637/8/10/493)
Supplement: s1 [file s1]

**Table S1:** Physicochemical analysis of raw milk and *amasi* samples [10].

| Sample | pH                       | TSS (g/100g)             | TTA (% lactic acid)      | Consistency (cm)          |
|--------|--------------------------|--------------------------|--------------------------|---------------------------|
| RM     | 6.64 ± 0.01 <sup>d</sup> | 9.47 ± 0.15 <sup>c</sup> | 0.02 ± 0.00 <sup>a</sup> | 23.00 ± 0.00 <sup>e</sup> |
| OP25   | 3.44 ± 0.01 <sup>a</sup> | 6.03 ± 0.38 <sup>a</sup> | 0.23 ± 0.00 <sup>c</sup> | 9.53 ± 0.25 <sup>a</sup>  |
| OP32   | 3.99 ± 0.08 <sup>b</sup> | 6.67 ± 0.15 <sup>b</sup> | 0.11 ± 0.00 <sup>b</sup> | 15.23 ± 0.25 <sup>b</sup> |
| SC25   | 3.94 ± 0.03 <sup>b</sup> | 6.67 ± 0.06 <sup>b</sup> | 0.14 ± 0.00 <sup>b</sup> | 17.27 ± 0.25 <sup>d</sup> |
| SC32   | 4.10 ± 0.02 <sup>c</sup> | 6.87 ± 0.06 <sup>b</sup> | 0.12 ± 0.07 <sup>b</sup> | 15.70 ± 0.17 <sup>c</sup> |

RM—raw milk, OP25—optimized fermented milk (*amasi*) at 25 °C, OP32—optimized fermented milk (*amasi*) at 32 °C, SC25—fermented milk (*amasi*) with starter culture at 25 °C, SC32—fermented milk (*amasi*) with starter culture at 32 °C. TSS—Total soluble solids, TTA—Total titratable acidity. Each value is a mean of triplicates, ± SD of triplicates, means with different letters within a column significantly differ ( $p \leq 0.05$ ).
